# Supplementary material
Source: Springer Nature journal article supplement (https://www.springermedizin.de/resource/supplementary/12967_2007_224_MOESM1_ESM.pdf/9575984)
Supplement: MOESM1 [file 9575984]

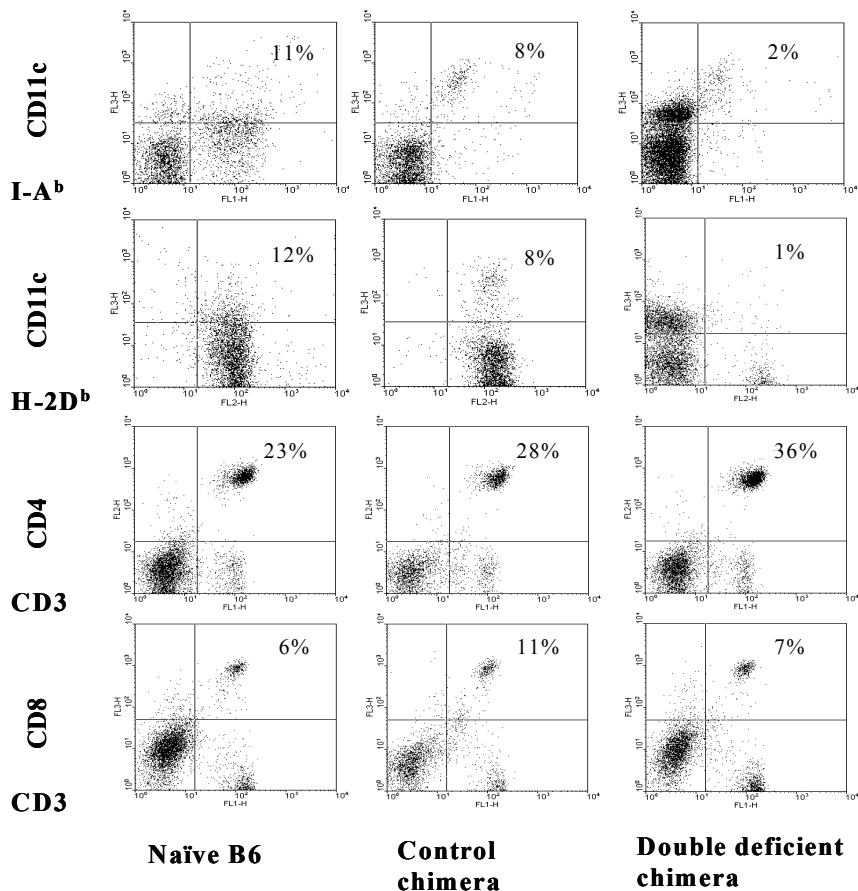

Additional figure 1: Presence of T cells in bone marrow chimeras and reduced percentage of MHC expressing APCs in MHC double deficient chimeras. MHC class I and class II deficient and control chimeric mice were produced by transplantation of BM from *class I<sup>-/-</sup>-II<sup>-/-</sup>* or B6 donors into irradiated B6 recipients, respectively. PBLs isolated from control and double MHC deficient chimeras, 6 weeks after transplantation, were analyzed by flow cytometry for I-A<sup>b</sup> and H-2D<sup>b</sup> expression in CD11c<sup>+</sup> APCs and for CD4 and CD8 expression in CD3<sup>+</sup> T cells. PBLs isolated from naïve mice were used as controls. The percentage of MHC expressing APCs, CD4<sup>+</sup> and CD8<sup>+</sup> T cells are indicated in the appropriate quadrant of their respective plots.
